# Supplementary material for: GenePainter: a fast tool for aligning gene structures of eukaryotic protein families, visualizing the alignments and mapping gene structures onto protein structures
Source: PubMed Central journal article supplement (PMC3605371; doi:10.1186/1471-2105-14-77), 2013-03-04
Supplement: 1471-2105-14-77-S2.pdf [file 1471-2105-14-77-S2.pdf]

## **Additional file 2**

This file contains a benchmark test of GenePainter on coronin, dynactin1, dynactin3, Wiskott Aldrich Syndrome protein (WASP), and myosin heavy chain genes. All sequences and gene structures can be found at CyMoBase (<http://www.cymobase.org>).

| Protein family     | # Sequences | Alignment length (positions) | Benchmark (seconds) |
|--------------------|-------------|------------------------------|---------------------|
| Coronin            | 552         | 1144                         | 65.492              |
| Dynactin1          | 207         | 2112                         | 22.480              |
| Dynactin3          | 213         | 428                          | 1.971               |
| WASP               | 229         | 2051                         | 9.124               |
| Myosin heavy chain | 2640        | 9214                         | 9,519.729           |
